# Supplementary material for: Watching DNA Replication Inhibitors in Action: Exploiting Time-Lapse Microfluidic Microscopy as a Tool for Target-Drug Interaction Studies in Mycobacterium
Source: PubMed Central journal article supplement (PMC6761567; doi:10.1128/aac.00739-19), 2019-09-23
Supplement: AAC.00739-19-s0001.pdf [file AAC.00739-19-s0001.pdf]

## Supplemental movie legends

**Supplemental movie 1.** Replication and segregation dynamics during novobiocin treatment. TLMM movies of representative cells of the Alpha-EYFP/DnaN-mCherry (top panel) and the DnaN-mCherry/ParB-mNeon (bottom panel) strains. After 5 hours (300 min) of growth under optimal conditions, the novobiocin ( $10\times IC_{50}$ ) was added (+Novo) and then removed 5 hours later (600 min). Images were acquired every 10-min. Scale bar 5  $\mu\text{m}$ .

**Supplemental movie 2.** Replication and segregation dynamics during Ndx treatment. TLMM movies of representative cells of the Alpha-EYFP/DnaN-mCherry (top panel) and the DnaN-mCherry/ParB-mNeon (bottom panel) strains. After 5 hours (300 min) of growth under optimal conditions, the Ndx ( $10\times IC_{50}$ ) was added (+Ndx) and then removed 5 hours later (600 min). Images were acquired every 10-min. Scale bar 5  $\mu\text{m}$ .

**Supplemental movie 3.** Replication and segregation dynamics during GM treatment. TLMM movies of representative cells of the Alpha-EYFP/DnaN-mCherry (left panel) and the DnaN-mCherry/ParB-mNeon (right top panel) and the Alpha-EYFP/ParB-mCherry (right bottom panel) strains. After 5 hours (300 min) of growth under optimal conditions, the GM ( $10\times IC_{50}$ ) was added (+GM) and then removed 5 hours later (600 min). Images were acquired every 10-min. Scale bar 5  $\mu\text{m}$ .

**Supplemental movie 4.** Chromosome and replisome dynamics during exposure to replication-affecting drugs. TLMM movies of representative cells of the HupB-EGFP/DnaN-mCherry strain during Ndx (left panel), novobiocin (middle panel) and GM (right panel) treatment. After 5 hours (300 min) of growth under optimal conditions, the antibiotics ( $10\times IC_{50}$ ) were added (+Ndx, +Novo,

+GM) and then removed 5 hours later (600 min). Images were acquired every 10-min. Scale bar 5  $\mu\text{m}$ .

### Supplemental Tables

| Strain name              | Relevant genotype                                                                                                                                                                                                                                                                                                                                                                                                          | Reference |
|--------------------------|----------------------------------------------------------------------------------------------------------------------------------------------------------------------------------------------------------------------------------------------------------------------------------------------------------------------------------------------------------------------------------------------------------------------------|-----------|
| Alpha-EYFP/DnaN-mCherry  | <i>M. smegmatis</i> Mc <sup>2</sup> 155 <i>alpha-eyfp</i> , <i>dnaN-mCherry</i>                                                                                                                                                                                                                                                                                                                                            | (1)       |
| DnaN- mCherry/ParB-mNeon | <i>M. smegmatis</i> Mc <sup>2</sup> 155 <i>dnaN-mcherry</i> , <i>parB-mNeon</i> ,                                                                                                                                                                                                                                                                                                                                          | (2)       |
| Alpha-EYFP/ParB-mCherry  | <i>M. smegmatis</i> Mc <sup>2</sup> 155 <i>alpha-eyfp</i> , <i>parB-mCherry</i>                                                                                                                                                                                                                                                                                                                                            | (1)       |
| DnaN-mCherry/HupB-EGFP   | <i>M. smegmatis</i> Mc <sup>2</sup> <i>dnaN-mcherry</i> , <i>hupB-egfp</i>                                                                                                                                                                                                                                                                                                                                                 | (3)       |
| RRL-19B                  | <i>E. coli</i> AB1157 ( <i>thr-1</i> , <i>araC14</i> , <i>leuB6(Am)</i> , $\Delta$ ( <i>gpt-proA</i> )62, <i>lacY1</i> , <i>tsx-33</i> , <i>qsr'-0</i> , <i>glnV44(AS)</i> , <i>galK2(Oc)</i> , <i>LAM-</i> , <i>Rac-0</i> , <i>hisG4(Oc)</i> , <i>rfbC1</i> , <i>mgl-51</i> , <i>rpoS396(Am)</i> , <i>rpsL31(strR)</i> , <i>kdgK51</i> , <i>xylA5</i> , <i>mtl-1</i> , <i>argE3(Oc)</i> , <i>thi-1</i> ) <i>ypet-dnaN</i> | (4)       |

**Table S1.** Characteristics of strains used in this study

## Supplemental Figures

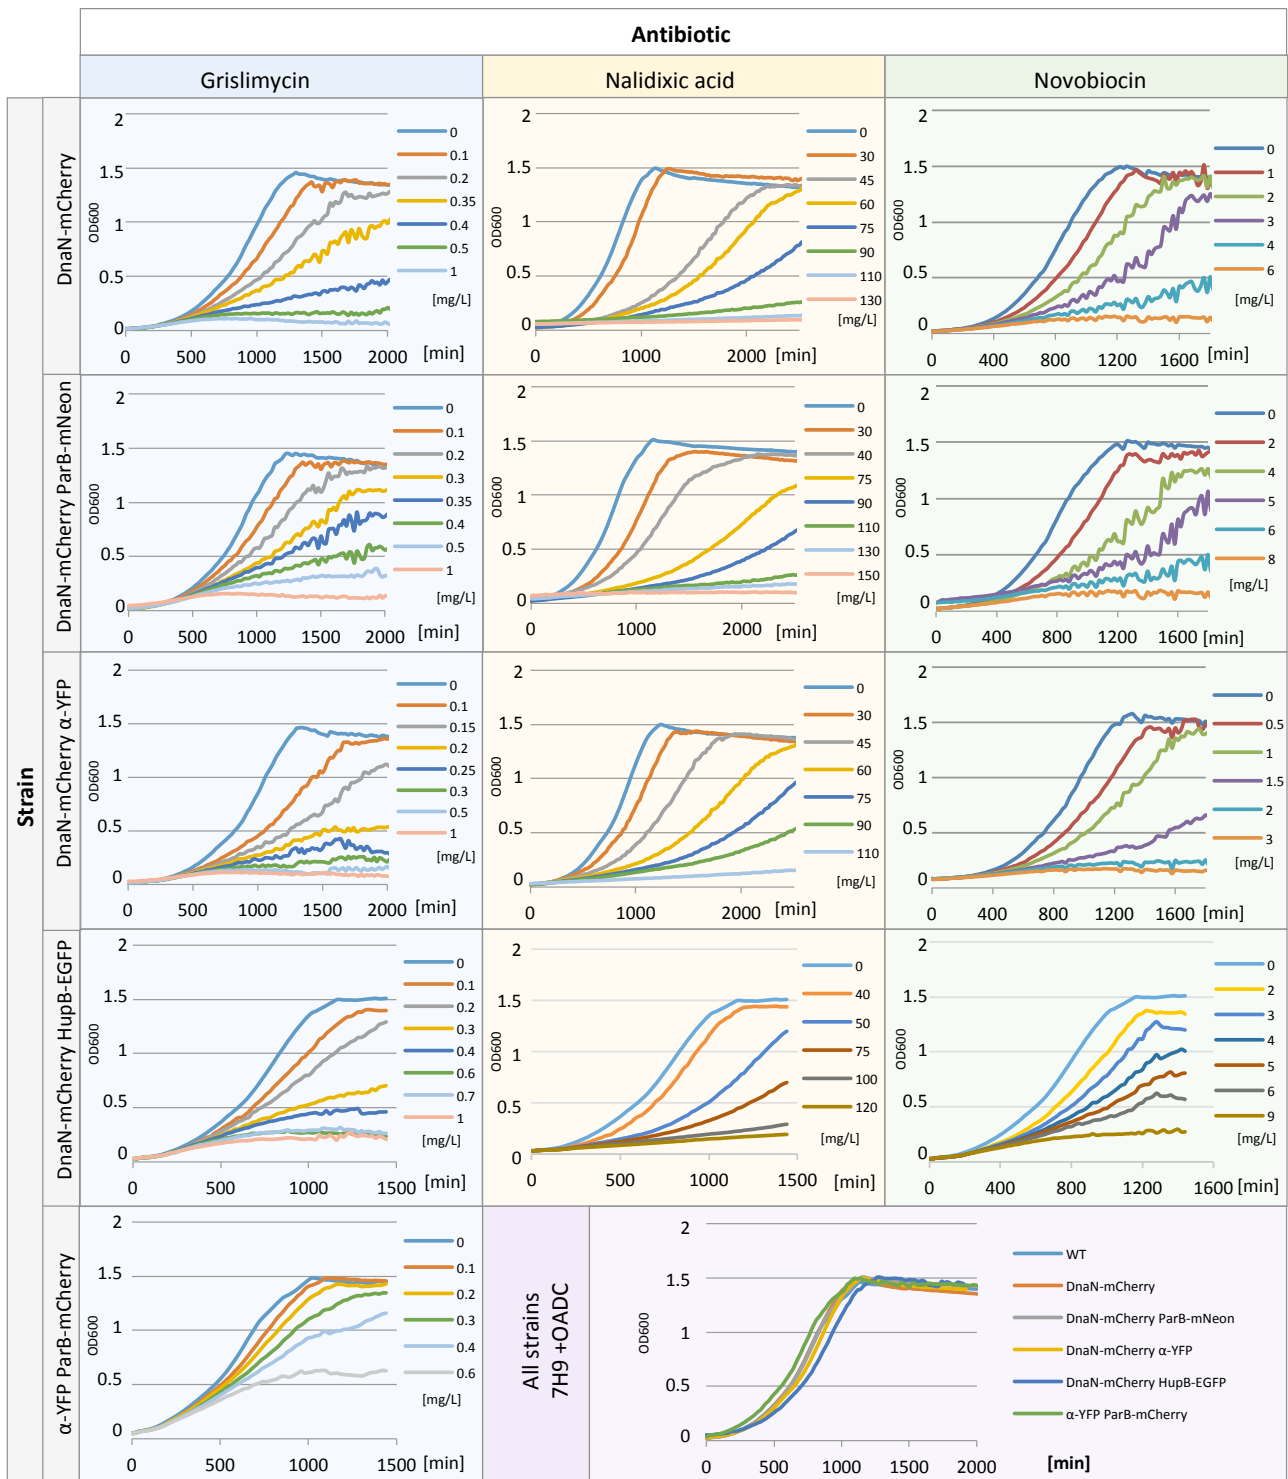

**Fig. S1.** Growth curves of the *M. smegmatis* strains used in this study in the presence of the different antibiotics. The right bottom panel presents the growth of all strains in antibiotic-free medium.

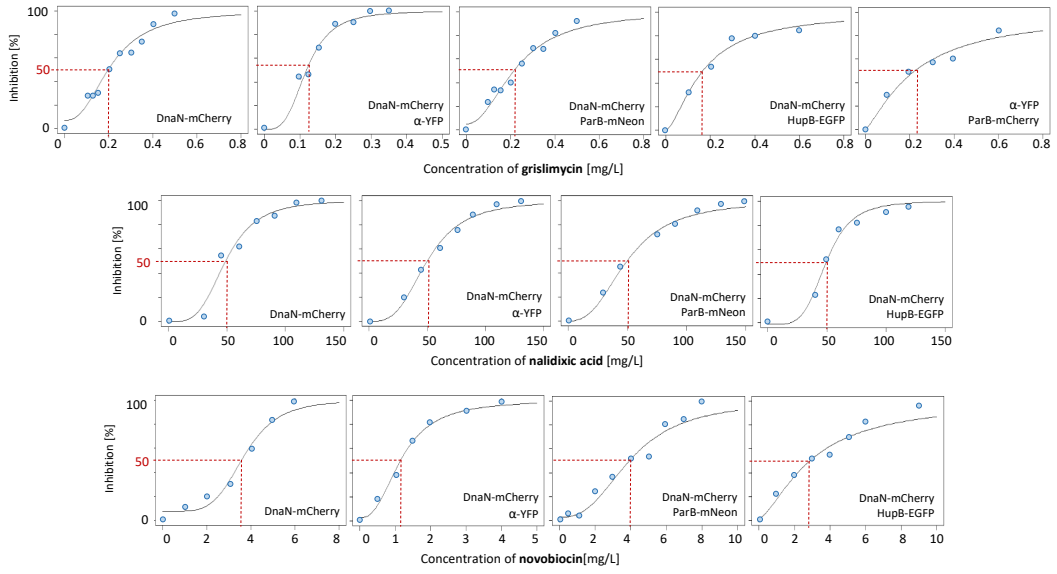

**Fig. S2.** Inhibition curves calculated from the growth curves plotted in Figure S1. Top panel, griseimycin; middle panel, nalidixic acid; bottom panel, novobiocin.  $IC_{50}$  is marked with a red dotted line.

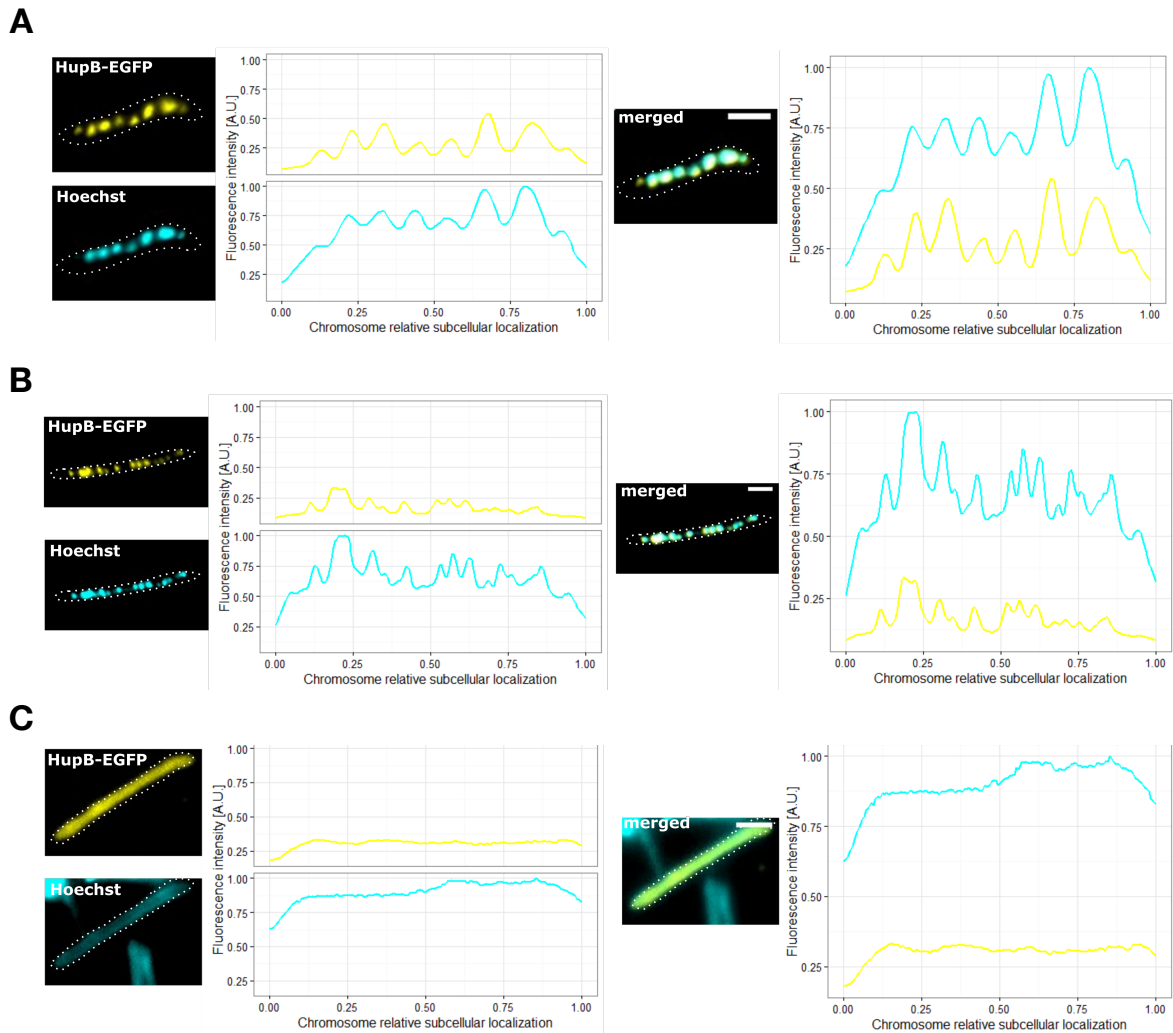

**Fig. S3.** The binding of HupB-EGFP to the chromosome is not affected under GM treatment, and reflects the nucleoid structure. Micrographs and corresponding fluorescence intensity profiles of DnaN-mCherry/HupB-EGFP cells stained with Hoechst 33342 before (A) and after 5 hours of GM treatment (B and C). During GM treatment, the chromosome is decondensed in some cells (B), while diffuse fluorescence is observed in others (C). Scale bar, 2  $\mu$ m.

### Supplemental references

1. Trojanowski D, Hołowka J, Ginda K, Jakimowicz D, Zakrzewska-Czerwińska J. 2017. Multifork chromosome replication in slow-growing bacteria. *Sci Rep* 7:43836.
2. Trojanowski D, Ginda K, Pióro M, Hołowka J, Skut P, Jakimowicz D, Zakrzewska-Czerwińska J. 2015. Choreography of the Mycobacterium Replication Machinery during the Cell Cycle. *mBio* 6:e02125-14.
3. Hołowka J, Trojanowski D, Janczak M, Jakimowicz D, Zakrzewska-Czerwińska J. 2018. The Origin of Chromosomal Replication Is Asymmetrically Positioned on the Mycobacterial Nucleoid, and the Timing of Its Firing Depends on HupB. *J Bacteriol* 200(10) e00044-18.
4. Reyes-Lamothe R, Sherratt DJ, Leake MC. 2010. Stoichiometry and Architecture of Active DNA Replication Machinery in *Escherichia coli*. *Science* 328:498–501.
